1  
2  
3  
4  
5  
6  
7  
8  
9  
10  
11  
12  
13  
14  
15  
16  
17  
18  
19  
20  
21  
22  
23  
24  
25  
26  
27  
28  
29  
30  
31  
32

**Mechanisms Contributing to the Dopamine Induction of Crawl-Like Bursting in  
Leech Motoneurons**

**Kevin M. Crisp<sup>1\*</sup>, Brian R. Gallagher<sup>1</sup>, Karen A. Mesce<sup>2</sup>**

**<sup>1</sup>Biology Department and Neuroscience Program, St. Olaf College, Northfield, MN**

**<sup>2</sup>Departments of Entomology and Neuroscience, University of Minnesota, Saint  
Paul, MN**

**RUNNING HEAD: Dopamine Modulates Leech Motoneurons**

\*Corresponding author

Kevin M. Crisp, Associate Professor

Biology Dept. and Neuroscience Program

St. Olaf College

1520 St. Olaf Ave.

Northfield, MN 55057

PH: 507-786-3981

FAX: 507-786-3968

[crisp@stolaf.edu](mailto:crisp@stolaf.edu)

**SUMMARY**

1  
2  
3  
4  
5  
6  
7  
8  
9  
10  
11  
12  
13  
14  
15  
16  
17  
18  
19  
20

Dopamine (DA) activates fictive crawling behavior in the medicinal leech. To identify the cellular mechanisms underlying this activation at the level of crawl-specific motoneuronal bursting, we targeted potential cAMP-dependent events that are often activated through DA<sub>1</sub>-like receptor signaling pathways. We found that isolated ganglia produced crawl-like motoneuron bursting after bath application of phosphodiesterase inhibitors (PDEs) that up-regulated cAMP. This bursting persisted in salines in which calcium ions were replaced with equimolar cobalt or nickel, but was blocked by riluzole, an inhibitor of a persistent sodium current. PDE-induced bursting contained a number of patterned elements that were statistically similar to those observed during DA-induced fictive crawling, except that one motoneuron (CV) exhibited bursting during the contraction rather than the elongation phase of crawling. Although DA and the PDE produced similar bursting profiles, intracellular recordings from motoneurons revealed differences in altered membrane properties. For example, DA lowered motoneuron excitability while the PDE increased resting discharge rates. We suggest that PDEs (and DA) activate a sodium-influx-dependent timing mechanism capable of setting the crawl rhythm and that multiple DA receptor sub-types are involved in shaping and modulating the phase relationships and membrane properties of cell-specific members of the crawl network to generate crawling.

1 **ABBREVIATIONS:**

2

3 AE excitor of the subcutaneous annulus erector muscle

4 AHP afterhyperpolarization

5 cAMP cyclic adenosine monophosphate

6 CLO clotrimazole

7 CPG central pattern generator

8 CV excitor of the ventrolateral circular muscle

9 DA dopamine

10 DCC discontinuous current clamp

11 DE-3 dorsal longitudinal muscle excitor

12 DI-1 dorsal longitudinal muscle inhibitor

13 DP dorsal posterior (nerve)

14 EIA Enzyme immunoassay

15 IBMX 3-isobutyl-1-methylxanthine

16 NS normal leech saline

17 PDE phosphodiesterase

18 PDI phosphodiesterase inhibitor

19 PIR post-inhibitory rebound

20 SPL 8-(*p*-sophonyl)theophylline

21 THP theophylline

22 VE-4 ventral longitudinal muscle excitor

23 VI-2 ventral longitudinal muscle inhibitor

24

## INTRODUCTION

Dopamine (DA) is known to play an impressive and universal role in the control of animal movements, often by exerting prolonged changes in the patterns of activity of locomotor-related neural networks (Chandler and Goldberg, 1984; Flamm and Harris-Warrick, 1986; Kemnitz, 1997; Lapointe et al., 2009; Quinlan et al., 1997; Teyke et al., 1993). In the medicinal leech, for example, DA has been shown to activate the central pattern generator (CPG) underlying crawling behavior (Puhl and Mesce, 2008; Puhl and Mesce, 2010). DA also serves an important function in the selection of competing or incompatible behaviors, exemplified by DA's suppression of swimming activity in the leech (Crisp and Mesce, 2004). Thus, DA often can act as a behavioral switch, both to activate and suppress competing behaviors (Mesce and Pierce-Shimomura, 2010; Vidal-Gadea et al., 2011). This theme of dual regulation appears to be conserved evolutionarily as additional examples can be found across multiple levels of animal complexity; for example, DA released by sensory neurons in *C. elegans* suppresses locomotion so as to prolong grazing when food is available (Sawin et al., 2000) or helps to match locomotor form to either an aquatic or terrestrial environment (Mesce and Pierce-Shimomura, 2010). In the human basal ganglia, DA plays a clinically-relevant role in the focused selection of competing patterns of intended movement (Mink, 1996; Smith et al., 1998), as well as regulating total body movement (e.g., hypokinesia associated with DA deficiency).

That DA can turn on and turn off the operation of competing neural circuits poses a number of fascinating questions, including the cellular mechanisms underlying DA's actions and how individual neurons are modulated in ways that promote or suppress locomotion. The medicinal leech (*Hirudo verbana*) possesses a number of significant advantages for the study of locomotion: it contains many neurons that have been uniquely identified with respect to their morphology, location, characteristic physiological activity, connectivity and behavioral functions (Kristan et al., 2005). Due to these advantages and the accessibility of its nervous system for electrophysiological studies, multiple behaviors in the leech have been analyzed at the level of individual cells, including a cellular-level understanding of behavioral decision-making (Kristan et al., 2005). Because network computational functions and biochemical signaling pathways are remarkably similar to

1 their vertebrate counterparts (Burrell and Sahley, 2001; Mullins et al., 2011), studies in  
2 the leech often have broad instructional value.

3 In the present study, we set out to understand how DA influences the membrane  
4 properties of neurons that might facilitate the production of crawling while suppressing  
5 swimming, a competing locomotor behavior. Because it is established that the crawl and  
6 swim networks share a number of the same participatory interneurons and motoneurons  
7 (Briggman et al., 2005), the issue of how a given neuromodulator can act to bias or  
8 facilitate a sub-set of neurons to perform either a crawl or swim pattern is especially  
9 compelling. Our study focuses on the larger and more experimentally accessible  
10 locomotor-related motoneurons, as a starting point, and the potential roles that DA has on  
11 their physiological properties.

## 13 MATERIALS AND METHODS

### 14 **Animals and solutions**

15 Adult medicinal leeches (*Hirudo verbana*) weighing 2-3 g were obtained from  
16 Leeches USA Ltd. (Westbury, NY) or Niagara Medicinal Leeches, Inc. (Ontario, Canada)  
17 and housed at 10-15°C in deionized water containing 0.5 g/L Instant Ocean aquarium  
18 salts (United Pet Group, Inc.; Cincinnati, OH) with the pH adjusted to 7.4. Leeches were  
19 anaesthetized on ice for 10-15 min prior to dissection.

20 All drugs were obtained from Sigma (Saint Louis, MO) except that the 8(p-  
21 sulfophenyl) theophylline (SPT) was obtained from Research Biochemicals, Inc. (Natick,  
22 MA). Drugs were dissolved at room temperature in leech saline (Nicholls and Baylor,  
23 1968) containing (in mM): 115 NaCl, 1.8 CaCl<sub>2</sub>, 4 KCl, 10 Tris-maleate (pH 7.4). IBMX  
24 and riluzole were solubilized in DMSO, which was then diluted to the working  
25 concentration (0.5 mM) in normal leech saline; the final concentration of DMSO did not  
26 exceed 0.1%. Theophylline (THP) was placed in HCl prior to dilution in saline and  
27 adjusted to 7.4 pH. The minimal concentration of all solvents was similar to that used  
28 previously and shown not to cause physiological effects during drug delivery in leech  
29 salines (Crisp and Muller, 2006). During intracellular recordings from motoneurons, 2  
30 mM MgCl<sub>2</sub> was added to the saline to reduce DA-induced oscillations, while in other  
31 experiments CaCl<sub>2</sub> was replaced with equimolar concentrations of NiCl<sub>2</sub> or CoCl<sub>2</sub>.

1

## 2 **Electrophysiological recordings**

3 Extracellular recordings of motor neuron DE-3 were obtained by differential  
4 recording of the dorsal posterior (DP) nerve. The DP nerve was carefully dissected free  
5 from muscle fibers, and a water-tight silicon well was constructed around the cut end of  
6 the nerve. Differential recordings were obtained using a model 1700 differential AC  
7 amplifier from A-M Systems (Sequim, WA) and filtered using a LPF202A low pass  
8 Bessel filter (Warner Instruments, Hamden, CT). Sixty Hz noise and harmonics were  
9 eliminated using the Hum Bug Noise Eliminator (Quest Scientific Instruments, Inc.  
10 (North Vancouver, BC). Raw data were digitized on a DigiData 132x series analog-to-  
11 digital converter from Molecular Devices (Sunnyvale, CA) and recorded using PClamp  
12 or AxoScope version 9.2 (Molecular Devices).

13 Specific neuronal somata were identified by their electrophysiological signature,  
14 position in the ganglion, and morphology when filled with label. Intracellular recordings  
15 were obtained with an AxoClamp 2B amplifier in bridge or discontinuous current clamp  
16 (DCC) mode and with glass microelectrodes (OD 1.0 mm, ID 0.75 mm, borosilicate  
17 glass; DAGAN Instruments, Minneapolis, MN) pulled to a tip resistance of 25-30 M $\Omega$  on  
18 a P-97 microelectrode puller (Sutter Instruments; Novato, CA). Electrodes were filled  
19 with 3M K<sup>+</sup> acetate for recordings and with 10 mM Alexa 568 fluorescent label  
20 (Invitrogen, Carlsbad, CA) in 200 mM KCl for iontophoretic dye injection. Label was  
21 injected into neurons (after re-impalement) for 3-5 min using 500 ms square pulses of -1  
22 nA current. When used for DCC, electrode tips were coated with dimethylpolysiloxane  
23 prior to use in order to reduce capacitance. Intracellular filtering and digitizing were as  
24 described above for extracellular signals.

25

## 26 **cAMP measurements**

27 Enzyme immunoassay (EIA) for measurement of cAMP concentrations were  
28 conducted using a cAMP EIA kit from Cayman Chemical (Ann Arbor, MI). Briefly,  
29 chains of ganglia from the second to the 20<sup>th</sup> midbody ganglia inclusive were treated for  
30 30 min at room temperature with 0.5 mM IBMX or drug-free saline. cAMP was then  
31 extracted by incubating the leech tissue in 0.1 M HCl for 30 min at room temperature and

1 analyzed for cAMP concentration according to the manufacturer's instructions. Lysates  
2 were analyzed using absorbance in 96-well plates on a plate reader.

3

#### 4 **Statistical methods and analysis**

5 Parameters and methods used to measure crawl-related burst cycle periods and  
6 durations were those of Puhl and Mesce (2008; 2010) and typically involved bursts that  
7 had clearly discernable onsets. A minimum of 6-10 consecutive bursts were analyzed for  
8 each preparation and means were compared across the number (n) of preparations tested.  
9 Standard unpaired Student's *t*-tests and one-way analysis of variance (ANOVA) were  
10 conducted, as well as Fisher LSD post-hoc tests, using Statistica version 7.1 (StatSoft Inc;  
11 Tulsa, OK). Graphs were generated using SigmaPlot 2004 (Systat Software Inc;  
12 Chicago, IL). All statistical tests were two-tailed with a 95% or greater confidence level  
13 ( $\alpha = 0.05$ ). Means are reported as  $\pm$  the standard error of the mean, and were calculated  
14 using Microsoft Office Excel 2003 (Microsoft Corporation; Redmond, WA).

15

16

## 16 **RESULTS**

### 17 **Phosphodiesterase inhibitors activate crawl-like bursting in identified motoneurons**

18 While DA has been convincingly demonstrated to activate fictive crawling, even  
19 in a single ganglion (Puhl and Mesce, 2008), the subcellular and biochemical  
20 mechanisms underlying such activation have yet to be explored. To begin to identify  
21 these mechanisms, we sought to determine whether crawling-related activity was  
22 dependent on cAMP second-messenger signaling. This approach was taken as the leech  
23 CNS is known to possess at least one DA<sub>1</sub>-like receptor, which has been shown to be  
24 positively coupled to adenylyl cyclase activity (Ali et al., 1998). This activity, in turn,  
25 increases the cytoplasmic concentration of cAMP, thus enhancing protein kinase A  
26 (PKA) activity and the serine/threonine phosphorylation of cellular proteins, including  
27 ion channels possibly involved in neuronal bursting. For example, PKA targets a  
28 persistent sodium current to increase bursting in the cerebral giant cells of *Lymnaea*  
29 (Nikitin et al., 2006) and increased cAMP levels have been linked to changes in the  
30 fictive swimming motor pattern in *Tritonia* (Clemens et al., 2007). Phosphodiesterases  
31 (PDEs) are known to inactivate cAMP (thus lowering PKA activity), enabling

1 phosphatases to dephosphorylate target proteins. Thus, perturbations in cAMP via PDE  
2 inhibitors (PDIs) were conducted here to test their contribution towards crawl-related  
3 bursting in relevant neurons.

4 To elevate cAMP levels, we applied the classic PDIs theophylline (THP) and 3-  
5 isobutyl-1-methylxanthine (IBMX) while recording from previously identified  
6 motoneurons (i.e., DE-3) known to exhibit slow bursting during spontaneous and DA-  
7 evoked crawling (Puhl and Mesce, 2008). We observed that 4.4 mM THP applied to  
8 individual isolated ganglia induced crawl-like bursting in DE-3 (Fig. 1A) (13 of 15  
9 preparations). However, THP is not only an inhibitor of cytoplasmic PDE activity but an  
10 adenosine receptor blocker as well. To control for whether THP might induce crawl-like  
11 bursting by blocking adenosine receptors, we used the polar adenosine receptor blocker,  
12 8-(*p*-sulfophenyl) theophylline (SPL; 4.4 mM bath application). [Because of its polarity,  
13 SPL mimics the extracellular actions of THP (e.g., adenosine receptor antagonism) but  
14 not its intracellular activity (e.g., PDE inhibition).] Blockade of adenosine receptors with  
15 SPL was found not to induce rhythmic bursting activity in DE-3 ( $n = 3$ ; Fig. 1A). Similar  
16 to the effects of THP, IBMX (500  $\mu$ M) produced crawl-like rhythmic bursting in DE-3  
17 (21 of 22 preparations) (Fig. 2A). In Fig. 1B, the cycle periods and burst durations of  
18 DE-3 induced by PDIs and by DA were compared using statistical methods. Burst  
19 durations and cycle periods were measured and analyzed from a randomly selected subset  
20 of ganglia treated with THP ( $n = 10$ ) and IBMX ( $n = 10$ ). DE-3 activity during unevoked  
21 (i.e., non-pharmacological or sensory induced) fictive crawling was also included in our  
22 analyses. Data for the DA and spontaneous fictive crawl studies were originally obtained  
23 by Puhl and Mesce (2008); the raw data were reanalyzed here for the quantitative  
24 comparisons made. An ANOVA was employed to compare burst durations and cycle  
25 periods across all treatments (Fig 1B) There was no statistically significant difference  
26 across treatments with respect to cycle period ( $F_{4,38} = 0.71$ ;  $p = 0.5$ ), but the effect of  
27 treatment on burst duration was statistically significant ( $F_{4,38} = 5.07$ ;  $p < 0.01$ ). Post-hoc  
28 Fisher LSD tests showed no statistically significant differences between burst durations  
29 obtained from single ganglia treated with DA ( $n = 10$ ), THP ( $n = 10$ ), IBMX ( $n = 10$ ), or  
30 from intact (i.e., whole) leech nerve cords ( $n = 10$ ) that exhibited spontaneous fictive  
31 crawling in normal saline (NS) in the absence of DA (CNS in NS;  $n = 10$ ; Fig. 1B). Only



1 the IK channel blocker clotrimazole (CLO, discussed in more detail later) resulted in a  
2 significantly longer burst duration ( $n = 3$ ) after post-hoc analysis across the five treatment  
3 groups (asterisk in Fig. 1B;  $p < 0.05$ ).

4 Figure 1C shows that THP applied to a chain of ganglia also induced periodic  
5 bursting in DE-3 (4 preparations). As with DA applied to chains lacking the cephalic  
6 ganglion, normal intersegmental phase delays were absent (Puhl and Mesce, 2010).

### 8 **Fictive crawling and swimming: Pathways and actions of adenylyl cyclase and** 9 **cAMP**

10 To determine the degree of cAMP elevation caused by IBMX specifically and at  
11 the concentration we used to induce bursting, we relied on an enzyme-linked  
12 immunosorbant assay (ELISA). Based on an ELISA whereby isolated nerve cords ( $n =$   
13 3) were incubated for 30 min with IBMX, we observed a 128% increase in cAMP (from  
14  $12.9 \pm 4.9$  pmol/ml extract to  $29.4 \pm 0.96$  pmol/ml extract). This measure demonstrated  
15 directly that cAMP levels were indeed amplified.

16 Because DA and PDIs produced similar bursting rhythms, we suspected that they  
17 may induce rhythmicity by a similar mechanism or pathway. If, on the other hand, DA  
18 and PDIs act through distinct and incompatible pathways, co-application of DA and a  
19 PDI should disrupt or degrade rhythmicity. Thus we measured 80 bursts from five  
20 IBMX-treated ganglia and 57 bursts from four ganglia treated with both DA and IBMX.  
21 For statistical comparisons, mean cycle periods from each ganglion were compared  
22 because of the unequal numbers of bursts measured per ganglion. We found that IBMX  
23 treatment caused an average cycle period of  $20.8 \pm 3.1$  s ( $n = 5$ ), while IBMX+DA  
24 treatment caused an average cycle period of  $21.9 \pm 8.7$  s ( $n = 4$ ); a Student's *t*-test yielded  
25 no statistically significant difference between these two treatment groups ( $t_7 = -0.13$ ;  $p =$   
26 0.9). Whether DA and IBMX converge on a common pathway to induce rhythmicity or  
27 act through distinct mechanisms that can be co-activated without interfering with one  
28 another must await further study.

29 It is noteworthy that although the DP nerve recording shown in Fig. 1A showed  
30 no units firing (showing that THP can induce bursting in quiescent preparations), other  
31 preparations exhibited a mean (pre-treatment) DE-3 tonic discharge rate of  $5.4 \pm 1.4$  Hz

1 (n = 7; rates averaged over 10-min intervals). Such spontaneous activity is common and  
2 has been described elsewhere (Garcia-Perez et al., 2007). We can not yet account for  
3 why a few of our isolated ganglia showed very low levels of spontaneous DP nerve  
4 activity while others did not.

5         Because PDIs can activate DE-3 bursting, we reasoned that adenylyl cyclase  
6 inhibition might suppress spontaneous neural activity in the DP nerve. To test this idea,  
7 we used MDL-12330a, a known inhibitor of adenylyl cyclase that significantly lowers  
8 basal cAMP concentrations in leech nervous tissues (Hunt and Evans, 1980; Biondi et al.,  
9 1990). We observed that after a 10-30 min application of 0.1-0.5 mM MDL-12330a,  
10 only a few DE-3 spikes per min were observed in isolated ganglia. Furthermore, no  
11 bursting was ever observed in either DE-3 or in any other units within the DP nerve from  
12 isolated ganglia (n = 4) or chains of ganglia (M2 through M19) (n = 3).

13         THP and other PKA activators, such as DB-cAMP, have previously been shown  
14 to be capable of activating fictive swimming (Hashemzadeh-Gargari and Friesen, 1989).  
15 In this earlier study, however, fictive crawling had not yet been characterized; thus it was  
16 not discussed. Fictive swimming is defined as at least three consecutive DE-3 bursts  
17 (typically recorded from the DP nerve) with a cycle period of 0.5-2.0 sec (Ort et al.,  
18 1974). The earlier experiments performed by Hashemzadeh-Gargari and Friesen (1989)  
19 used chains of ganglia from M2 to M19. In our hands, only one of seven preparations  
20 (M2-M19) exhibited fictive swimming when treated with 4-5 mM THP and only one of  
21 eight swam spontaneously in 50-200  $\mu$ M DB-cAMP; we also observed a few swim  
22 episodes in two of four chains comprised of seven ganglia treated with THP (data not  
23 shown). No swim episodes were observed from isolated single ganglia treated with THP  
24 (n = 17) or IBMX (n = 15), although swim induction in single ganglia is infrequent even  
25 in response to potent swim-inducing stimuli (Hocker et al., 2000).

26         Because elements of the crawl CPG (specifically, the elongation network) are  
27 thought to be a component of the swim CPG (Esch et al., 2002; Briggman et al., 2005), it  
28 is not surprising that some swimming was observed when the crawl CPG was activated.  
29 In contrast, when DA is used to activate the crawl CPG, swimming is never observed  
30 because DA is a potent inhibitor of the swim CPG (Crisp and Mesce, 2004). Thus we

1 suggest that THP mimics DA in activating the crawl CPG, but not in suppressing the  
2 swim CPG.

3

#### 4 **Insights into mechanisms underlying PDI-induced bursting**

5 As we showed in Figure 1, THP dissolved in normal leech saline (containing 1.8  
6 mM  $\text{Ca}^{2+}$ ) produced crawl-like DE-3 bursting. Similar bursting, however, has previously  
7 been observed in  $\text{Ca}^{2+}$ -free saline (Angstadt and Friesen, 1991). To determine whether  
8 THP-induced bursting requires  $\text{Ca}^{2+}$  influx, we dissolved THP in saline in which we  
9 replaced the  $\text{Ca}^{2+}$  with equimolar nickel ( $n = 3$ ) or equimolar cobalt ( $n = 2$ ). We observed  
10 that THP-induced DE-3 bursting in the absence of  $\text{Ca}^{2+}$  was not statistically different  
11 from THP-bursting in the presence of  $\text{Ca}^{2+}$  with respect to cycle period ( $t_6 = -0.41$ ,  $p >$   
12  $0.05$ ) or burst duration ( $t_6 = -0.86$ ,  $p > 0.05$ ). For example, THP-induced bursting had a  
13 cycle period of  $20.4 \pm 2.4$  s ( $n = 5$ ) in 1.8 mM  $\text{Ca}^{2+}$  compared to  $22.3 \pm 4.2$  s ( $n = 3$ ) in  
14 1.8 mM  $\text{Ni}^{2+}$ . Burst durations appeared to be slightly longer in 1.8 mM  $\text{Ni}^{2+}$  ( $7.4 \pm 2.7$  s)  
15 than in 1.8 mM  $\text{Ca}^{2+}$  ( $5.5 \pm 0.8$  s), but this difference was not statistically significant ( $t_6 =$   
16  $-0.86$ ,  $p > 0.05$ ). THP-induced bursts were not observed when 2 mM  $\text{MgCl}_2$  (in addition  
17 to 1.8 mM  $\text{Ca}^{2+}$ ) was included in the saline ( $n = 6$ ) or when  $\text{Ca}^{2+}$  was elevated to 8 mM ( $n$   
18  $= 5$ ). It is unclear whether these actions are due to interference with  $\text{Ca}^{2+}$ -dependent  
19 mechanisms or a general effect of divalent cations on cellular excitability  
20 (Frankenhaeuser and Hodgkin, 1957).

21 Clotrimazole (CLO), briefly mentioned earlier, is a selective blocker of  
22 intermediate conductance  $\text{Ca}^{2+}$ -dependent  $\text{K}^+$  (IK) channels (Engbers et al., 2012; Ishii et  
23 al., 1997; Joiner et al., 1997), which are known to be inhibited when phosphorylated by  
24 PKA (Neylon et al., 2004). We observed that 25  $\mu\text{M}$  CLO produced bursting in the DP  
25 nerve with a cycle period ( $20.0 \pm 2.2$  s) similar to DA, THP and IBMX ( $n = 3$ ) (Fig. 1B).  
26 This cycle period was also similar to that previously reported using  $\text{Ca}^{2+}$  channel blockers  
27 ( $23.2 \pm 2.7$  s) (Angstadt and Friesen, 1991). However, the mean burst durations observed  
28 in CLO were significantly longer ( $13.5 \pm 1.7$  s;  $p < 0.05$ ) than bursts observed in DA ( $5.4$   
29  $\pm 0.6$  s), THP ( $5.5 \pm 0.8$  s) or IBMX ( $5.1 \pm 0.5$  s; Fig. 1B), and longer than previously  
30 reported for  $\text{Ca}^{2+}$  channel blockers ( $6.6 \pm 0.52$  s) (Angstadt and Friesen, 1991). Thus, the  
31 duty cycle observed in CLO (66%) was considerably longer than that in DA (35%) (Puhl

1 and Mesce, 2008), THP (37%) or IBMX (28%). CLO has also been reported to inhibit  
2  $\text{Na}^+$ - $\text{K}^+$  pump activity (Bartolommei et al., 2008); treatments that inhibit this pump, such  
3 as oubain (Angstadt and Friesen, 1991) and low extracellular  $\text{K}^+$  (Angstadt et al., 1998),  
4 have been shown to increase the duration of bursts induced by  $\text{Ca}^{2+}$  channel blockers in  
5 leech neurons.

6 In saline lacking  $\text{Ca}^{2+}$  ions, many leech neurons show bursting activity that is  
7 dependent on sodium influx (Angstadt and Choo, 1996). To test the hypothesis that PDIs  
8 activate bursting that is driven by sodium influx, a series of experiments were conducted  
9 in which THP or IBMX were co-applied with riluzole, a sodium channel blocker.  
10 Riluzole is known to selectively block the persistent, non-inactivating component of the  
11 sodium current while sparing the transient component that is required for normal action  
12 potential generation (Kononenko et al., 2004; Niespodziany et al., 2004; Urbani and  
13 Belluzzi, 2000). In the leech, riluzole has been shown to impair sodium-dependent PIR  
14 but does not interfere with spike generation in motoneurons (Angstadt et al., 2011). We  
15 found that 200  $\mu\text{M}$  riluzole was sufficient to block bursting produced by either 4.4 mM  
16 THP ( $n = 3$ ) or 0.5 mM IBMX ( $n = 4$ ). For example, Figure 2A shows an experiment in  
17 which DE-3, in a single ganglion, was induced to burst with IBMX (15 min application).  
18 Perfusion of saline containing 200  $\mu\text{M}$  riluzole (with 0.5 mM IBMX) for several minutes  
19 halted bursting, although these preparations were still able to fire impulses (Fig. 2B).  
20 Removing riluzole, by extensively perfusing the ganglion with saline containing 0.5 mM  
21 IBMX only, restored bursting (Fig. 2C). Similarly, a 50% reduction of extracellular  
22 sodium ion concentration by substitution with equimolar N-methyl-D-glucamine  
23 suppressed THP-induced bursting ( $n = 3$ ; data not shown). In contrast, 25  $\mu\text{M}$  nifedipine,  
24 a blocker of voltage-gated  $\text{Ca}^{2+}$  channels, did not noticeably affect THP-induced bursting  
25 ( $n = 2$ ; data not shown). Together, these data are consistent with the hypothesis that PDIs  
26 activate a bursting mechanism in which sodium influx, rather than  $\text{Ca}^{2+}$ , drives burst  
27 generation.

28

29 **Phosphodiesterase inhibitors and DA exert distinct effects on specific crawl-related**  
30 **motoneurons**

1 In response to DA, motoneurons DI-1, VI-2 and CV rhythmically burst during the  
2 elongation phase of crawling, whereas motoneurons DE-3, VE-4 and AE fire out-of-  
3 phase during the contraction phase (Puhl and Mesce, 2008). To determine if DA acts  
4 through cAMP-mediated cascades, to promote crawl-like bursting across a wide variety  
5 of crawl-related motoneurons, we examined the cells just mentioned in the presence of  
6 THP or IBMX. Furthermore, we asked whether the PDIs could substitute, in part, for the  
7 network-organizing actions of DA. Because only DE-3 can be effectively monitored via  
8 spikes in the DP nerve, intracellular recordings were made from the other motoneurons.  
9 In IBMX or THP (0.5 mM and 4.4 mM, respectively), motoneurons DI-1, VI-2, VE-4  
10 and AE not only fired in bursts but they fired during their correct phases. Cell CV was  
11 observed to burst; however, it fired incorrectly and was in phase with DE-3 (n = 4; Fig.  
12 3). Because the somata (i.e., recording site) of these motoneurons are electrically  
13 inexcitable, their recorded impulses appear small in amplitude. DI-1 and VI-2 are  
14 inhibitory motoneurons that become inhibited when the excitatory motoneurons DE-3  
15 and VE-4 are excited during the contraction phase. It is noteworthy that other identified  
16 neurons known not to burst during DA-induced or spontaneous crawling were not  
17 observed to burst in IBMX or THP; these included the serotonergic Rz cell (n = 8), the  
18 touch (T) mechanoreceptor cell (n = 4) and the nociceptive N cell (n = 4). Each of these  
19 neurons, in contrast, fires bursts of impulses spontaneously in Ca<sup>2+</sup>-free saline (Angstadt  
20 and Friesen, 1991), indicating that the PDIs are more selective in their actions.

21 To identify the range of ionic currents modulated by DA via cAMP-dependent  
22 mechanisms, we needed first to characterize how the membrane properties of the crawl-  
23 related neurons change in the context of DA modulation. To address this issue, we  
24 exposed ganglia to a 30-min bath application of 75  $\mu$ M DA, which is known to induce  
25 fictive crawling (Puhl and Mesce, 2008). We used a discontinuous current clamp (DCC)  
26 and monitored membrane potential trajectories for 3 s following the termination of a 1-s  
27 single depolarizing and single hyperpolarizing current pulse. All neurons were held at -40  
28 mV with current injection during the DCC experiments. Neurons requiring more than  $\pm$   
29 0.25 nA to maintain a membrane potential of -40 mV were considered damaged and data  
30 from such cells were not analyzed.

1 For CV, we found an increase in its AHP (area below baseline during 500 ms  
2 beginning 50 ms after the end of current injection) that was statistically significant ( $F_{1,17}$   
3 = 6.15;  $p < 0.05$ ;  $n = 9$  control,  $n = 10$  in DA). DA increased the mean area below  
4 baseline during the AHP from  $-577 \pm 123$  mV x ms in NS ( $n = 9$ ) to  $-1862 \pm 284$  mV x  
5 ms in DA ( $n = 10$ ). We also observed a decrease in the duration of its PIR (Fig. 4A, C),  
6 which was not associated with a statistically-significant reduction of the area under the  
7 curve. The area under the curve of the PIR is a measure of peak membrane potential and  
8 duration of sustained change during 500 ms beginning 50 ms after the end of current  
9 injection. CV showed a nonsignificant decrease in the mean area under the curve from  
10  $3199 \pm 530$  mV x mS in NS ( $n = 11$ ) to  $2519 \pm 517$  mV x ms in DA ( $n = 11$ ). Likely, the  
11 similar area measurement was due to a more pronounced peak and shorter time course in  
12 DA as compared to the more long-lasting PIR observed in NS. The enhanced peak was  
13 associated with a statistically significant increase in firing rate during the PIR in CV,  
14 from  $8.3 \pm 1.1$  spikes to  $17.2 \pm 3.3$  spikes in an interval of 500 ms following termination  
15 of a 1-s current pulse of -2 nA ( $t_5 = -2.61$ ,  $p < 0.05$ ).

16 DA significantly decreased the duration of the PIR in AE ( $F_{1,7} = 8.96$ ;  $p < 0.05$ ;  $n$   
17 = 5 control,  $n = 4$  in DA). The mean area under the curve decreased from  $1624 \pm 328$   
18 mV x ms in NS ( $n = 10$ ) to  $499 \pm 61$  mV x ms in DA ( $n = 10$ ). The effect on its AHP was  
19 less pronounced (Fig. 4B, D) and not statistically significant. The area under baseline  
20 during the AHP decreased from  $1067 \pm 81$  mV x ms in NS ( $n = 10$ ) to  $873 \pm 286$  mV x  
21 ms in DA ( $n = 10$ ). The PIR in leech motoneurons appears to have an early component  
22 and a late component (Angstadt et al., 2011); it is the late component that appears to be  
23 diminished following DA treatment in AE. It has been previously reported that DA  
24 causes a statistically significant increase in the peak amplitude of the PIR in DE-3, but  
25 not the area under the curve (Vallecorsa et al., 2007).

26 An increase in overall cellular excitability is one way that neuromodulators can  
27 exert their influence over CPG activation (Clemens and Katz, 2003; Dai et al., 1998;  
28 Fedirchuk and Dai, 2004; Katz, 1998; Katz and Frost, 1997). Based on firing frequency,  
29 as an indicator of cell excitability, we found that DA reduced neuronal excitability, but  
30 only in the context of current injection. We again used a DCC protocol but one that  
31 stepped cells from -2 to +2 nA in steps of +0.5 nA. In normal saline, AE fired impulses

1 tonically at a rate of  $5.8 \pm 1.5$  Hz ( $n = 4$ ), close to its resting firing rate when treated with  
2  $75 \mu\text{M}$  DA ( $6.6 \pm 0.7$  Hz;  $n = 5$ ). However, when treated with DA, a +1 nA current pulse  
3 increased the spike firing frequency of AE only to  $12.6 \pm 2.1$  Hz ( $n = 5$ ) as compared to  
4  $18 \pm 2.3$  Hz ( $n = 4$ ) in normal saline (Fig. 5A). This difference was even greater in CV,  
5 where again the resting firing rates were similar in saline and DA [ $9.0 \pm 1.8$  Hz, control  
6 ( $n = 8$ ) vs  $6.0 \pm 1.6$  Hz, in DA ( $n = 8$ ); (Fig. 5B)]. A +1 nA current injection increased  
7 the firing frequency of CV only to  $23.0 \pm 3.0$  Hz in DA as compared to  $41.2 \pm 3.8$  Hz in  
8 normal saline. These results are consistent with prior observations that DA exerts a  
9 generally inhibitory influence on leech neurons (Ali et al., 1998; Crisp and Mesce, 2004;  
10 Sargent, 1975), but helps to enhance their patterned activity.

11 We next asked whether mimicking DA<sub>1</sub> receptor activation with THP can cause  
12 the full range of DA-induced physiological changes in motoneurons just presented. In  
13 contrast to the direct effects of DA, bath application of 4.4 mM THP for 20-40 min did  
14 not noticeably enhance the PIR of CV ( $n = 4$ ; data not shown), nor did it mimic the effect  
15 of DA on the excitability of CV ( $n = 4$ ; Fig 5C) or AE ( $n = 6$ ; Fig 5D). For example,  
16 injection of +1 nA positive current resulted in a firing rate of  $18.0 \pm 2.3$  Hz in normal  
17 saline and  $20.0 \pm 2.2$  Hz in THP. In addition, while DA only caused a slight increase in  
18 the resting discharge rate of the AE cell (from  $4.0 \pm 1.5$  Hz in normal saline to  $6.6 \pm 0.8$   
19 Hz in DA), THP also caused an increase in resting discharge rate ( $15.2 \pm 3.8$  Hz).  
20 Similarly, the resting discharge rate for CV was  $9.0 \pm 1.8$  Hz in normal saline but  $17.8 \pm$   
21  $3.7$  Hz in THP ( $n = 4$ ). On the other hand, THP diminished or eliminated the PIR in the  
22 AE cell ( $n = 6$ ; data not shown). ANOVAs were employed to analyze the effects of DA,  
23 THP and NS on the resting discharge rates and slopes of the F-I curves in Fig. 5C, D.  
24 There was a significant effect of treatment on cell CV ( $F_{4,34} = 5.11$ ;  $p < 0.01$ ), and Fisher  
25 LSD post-hoc tests revealed that DA caused a significant reduction in slope compared to  
26 NS ( $p < 0.05$ ); there was no significant difference between the effect of THP and NS on  
27 slope. THP caused a significant increase in resting discharge rate compared to DA ( $p <$   
28  $0.05$ ) and NS ( $p < 0.01$ ). Similarly, there was a significant effect of treatment on AE  
29 ( $F_{4,22} = 8.13$ ;  $p < 0.001$ ) and post-hoc tests revealed that DA caused significant reduction  
30 in slope compared to NS ( $p < 0.05$ ). THP was not different from either DA or NS with  
31 respect to slope, but was significantly different from DA ( $p < 0.001$ ) and NS ( $p < 0.001$ )

1 with respect to resting discharge rate. These results indicate that DA is likely affecting  
2 crawl-related targets by modulating a number of DA receptor-mediated pathways beyond  
3 a DA<sub>1</sub>-like type.

## 5 DISCUSSION

6 Here we have demonstrated several cellular mechanisms that may be involved in  
7 the DA induction of fictive crawl-related bursting in leech ganglia. Specifically, we have  
8 shown that elevating cAMP by inhibiting PDE activity induces robust DE-3 motoneuron  
9 bursting that resembles DA-activated fictive crawling. This bursting activity relies on a  
10 sodium rather than a Ca<sup>2+</sup> influx. Furthermore, bursting with a similar cycle period can  
11 be induced by pharmacologically inhibiting a Ca<sup>2+</sup>-dependent K<sup>+</sup> current, specifically, an  
12 IK-like current. We have also shown, through intracellular recordings, that DA  
13 modulates the intrinsic membrane properties of a variety of crawl-related motoneurons in  
14 ways that may facilitate participation in patterned bursting. Not all the actions of DA,  
15 however, can be mimicked by inhibiting PDE activities, suggesting the involvement of  
16 non DA<sub>1</sub>-like receptors not positively-coupled to cAMP.

17 We suggest that DA activates crawling through at least two pathways, only one of  
18 which is mimicked by THP. In one pathway, an extrinsic oscillator or timing network is  
19 activated that is capable of generating crawl-like bursting in leech motoneurons. This  
20 timing mechanism, under experimental conditions, is capable of driving the crawl or  
21 swim CPG, but in the presence of DA will induce only crawling as DA is known to be a  
22 potent inhibitor of swimming (Crisp and Mesce, 2004). This timing mechanism may be a  
23 separate module of the CPG from that responsible for generating the phase relationships  
24 among the motoneurons. Occasionally, in recordings of fictive walking and scratching in  
25 cats, some motoneuron pools fail to fire during their appropriate phase in the rhythm, but  
26 the cycle period remains unaffected by this deletion, suggesting a dissociation of the  
27 timing mechanism from the motoneuron patterning network (Lafreniere-Roula and  
28 McCrea, 2005; Rybak et al., 2006). These observations suggest that some CPGs may  
29 possess independent timing elements that govern the overall temporal structure of the  
30 motor pattern (e.g., cycle period) and patterning elements that govern motor neuron  
31 activity within the cycle (e.g., phase relationships).



1           The second action of DA, which is not readily mimicked by THP, consists of the  
2 modification of excitability and afterpotentials of motoneurons. While this latter function  
3 may be related to a general inhibitory function of DA that helps to suppress incompatible  
4 motor behaviors (i.e., swimming), modulation of dynamic membrane properties may help  
5 motoneurons to maintain firing patterns that follow a rhythmic excitatory drive with  
6 fidelity.

### 8 **Induction of Bursting in Leech Neurons**

9           Leech neurons that are normally quiescent at rest can be induced to burst through  
10 several pharmacological manipulations. For example, in all leech neurons examined to  
11 date, a persistent sodium current will drive sodium plateau potentials resulting in  
12 rhythmic bursting unless this inward current is opposed by  $\text{Ca}^{2+}$ -dependent  $\text{K}^+$  currents.  
13 This rhythmic bursting activity is evident when leech neurons are treated with  $\text{Ca}^{2+}$   
14 channel blockers (Angstadt and Friesen, 1991).  $\text{Ca}^{2+}$ -dependent  $\text{K}^+$  and persistent sodium  
15 currents have opposing effects on excitability (Burrell and Crisp, 2008; Wu et al., 2005)  
16 and contribute to oscillations and bursting in various ways across different neuronal types  
17 (Boehmer et al., 2000; Gutfreund et al., 1995; Hu et al., 2002). Our finding that riluzole  
18 (a blocker of the persistent sodium current) impairs PDI-induced bursting, in contrast to  
19  $\text{Ca}^{2+}$  channel blockers such as cobalt, supports the hypothesis that DA acts through a  
20 cAMP-dependent pathway to activate a bursting mechanism involving sodium-based  
21 plateau potentials. A persistent sodium channel has been found to be a target of PKA in  
22 *Lymnaea* (Nikitin et al., 2006), suggesting a potential biochemical connection between  
23 cAMP concentrations and sodium plateau generation.

24           While enhancing persistent sodium currents or blocking  $\text{Ca}^{2+}$ -dependent  $\text{K}^+$   
25 currents seem like plausible means by which PDIs may activate elements of the crawl  
26 oscillator, the effects of DA on CV and AE would be better explained by opposite effects  
27 on these currents. Recently, blocking persistent sodium currents with riluzole has been  
28 shown to *reduce* the late component of the PIR and block bursting in cell DE-3 (Angstadt  
29 et al., 2011), unlike DA, which attenuates the PIR and *promotes* bursting. Furthermore,  
30 while reduced sodium salines decrease PIR in DE-3, the PIR is eliminated only when  
31 sodium is reduced and  $\text{Ca}^{2+}$  is replaced with nickel (Angstadt et al., 2005) or in solutions

1 containing high concentrations (10 mM) of nickel (Angstadt et al., 2011). These  
2 observations suggest that a portion of the PIR is  $\text{Ca}^{2+}$ -dependent and suggest that the PIR  
3 is mediated by both persistent sodium and nonspecific cation currents.

4 If DA activates oscillations by unmasking or potentiating a persistent sodium  
5 current, one might also expect an increase in excitability and PIR in cells modulated by  
6 this mechanism. However, even if DA enhances the persistent sodium current in specific  
7 motoneurons, the ability of such a change to increase excitability may be limited by the  
8 cell's input resistance, the extent of its electrical coupling and the expression of other  
9 currents contributing to the whole cell I-V curve (Zhao et al., 2010). Furthermore, DA  
10 may diminish PIR in DE-3 cells through combined mechanisms, such as enhancing a  
11  $\text{Ca}^{2+}$ -dependent  $\text{K}^+$  conductance, inhibiting the riluzole-sensitive persistent sodium  
12 current or inhibiting a  $\text{Ca}^{2+}$ -dependent nonspecific cation current (Angstadt et al., 2011).  
13 Any of these mechanisms could contribute to a decrease in excitability.

#### 14 15 **Implication of Multiple DA Receptor Subtypes**

16 The opposing actions of  $\text{DA}_1$  and  $\text{DA}_2$  receptors were characterized in the mollusc  
17 *Lymnaea* almost 30 years ago (Stoof et al., 1984), and newer cell-molecular and  
18 pharmacological studies have suggested the presence of at least three classes of DA  
19 receptors in invertebrates (Mustard et al., 2005). In the lobster stomatogastric nervous  
20 system, DA has been shown to be an important modulator altering motor pattern  
21 expression (Ayali and Harris-Warrick, 1999; Mullins et al., 2011; Vidal-Gadea et al.,  
22 2011). DA's action are often mediated through multiple and sometimes opposing  
23 modulatory effects on neurons within a given circuit. For example, DA enhances an A-  
24 type  $\text{K}^+$  conductance in the pyloric dilator neuron (Kloppenburger et al., 1999), but  
25 depresses this same conductance in the lateral pyloric neuron (Harris-Warrick et al.,  
26 1995). These opposing actions can be explained by the expression of  $\text{DA}_1$  (but not  $\text{DA}_2$ )  
27 receptors in the lateral pyloric neuron and  $\text{DA}_2$  (but not  $\text{DA}_1$ ) receptors in the pyloric  
28 dilator neuron (Zhang et al., 2010).

29 Although previous evidence suggests the presence of a  $\text{DA}_1$ -like receptor in the  
30 leech (Ali et al., 1998; Colombaioni and Brunelli, 1988; Salzet et al., 1998), the  
31 pharmacological properties of this receptor and other sub-types may be distinct from

1 other species. The leech likely has a second class of DA receptors not positively coupled  
2 to cAMP. For example, DA but not cAMP inhibit ion transport across leech skin (Milde  
3 et al., 2001). Similarly, not all the effects of DA on the crawl circuit can be mimicked  
4 by PDIs, as evidenced by the improper phase relationships of DE-3 and CV and the  
5 inability of THP to reduce motoneuron excitability. Preliminary studies show that  
6 apomorphine, a possible DA<sub>2</sub>-like agonist in leech, can induce crawl-like bursting with  
7 CV in phase with DE-3 (Puhl and Mesce, personal communication). The DA<sub>2</sub>-receptor  
8 family contains receptors that are negatively coupled to adenylyl cyclase, and while no  
9 DA<sub>2</sub>-like receptor has yet to be characterized pharmacologically in *Hirudo*, genes for  
10 several DA<sub>2</sub>-receptor families have been identified in the leech *Helobdella robusta*  
11 (EMBL-EBI accession numbers IPR 001620, IPR 001922 & IPR 002185).

12

### 13 **Behavioral Significance of DA Modulation of Motoneurons**

14 Modulation of crawl motoneurons may reflect two parallel actions of DA. First,  
15 DA modulates membrane properties known to contribute to rhythm generation. After  
16 DA treatment, CV shows an enhanced AHP and a higher firing frequency during the peak  
17 PIR. Interestingly, no statistically significant increase in AHP was observed in either  
18 DE-3 or AE, although DE-3 showed an enhanced peak in its PIR (Vallecorsa et al.,  
19 2007). DE-3 and CV innervate the longitudinal and circular muscles, respectively, and  
20 both of these are body wall muscles that are directly responsible for locomotor  
21 movements. In contrast, AE innervates the annular erector musculature, and the role of  
22 annular erection in crawling is less clear, though it may aid in traction. Possibly for this  
23 reason, AE bursts late in contraction (Eisenhart et al., 2000), giving it a somewhat unique  
24 phase relationship to the other motoneurons that may be reflected in its unique pattern of  
25 modulatory changes.

26 It is not yet clear how a DA-induced decrease in motoneuron excitability would  
27 facilitate the expression of rhythmic bursting during fictive crawling. Quite to the  
28 contrary, it seems that an increase in excitability would be more likely to promote  
29 bursting in leech motoneurons. A decreased excitability may, however, contribute to a  
30 generalized inhibitory effect of DA that could help to suppress the expression of  
31 incompatible behaviors, especially swimming (Crisp and Mesce, 2004). Furthermore, the

1 duration and firing frequencies exhibited by locomotor motoneurons affect both the rate  
2 of muscle contraction and time to peak contraction. Thus, a decrease in excitability may  
3 well facilitate the ability of each body segment to transition smoothly from any given  
4 body length, enabling the metachronal waves of crawl activity to progress gracefully  
5 along the animal's body as it repeatedly elongates and shortens. One overarching lesson  
6 gleaned from our studies is that DA has the ability to activate a mosaic of cellular actions.  
7 Answers to how each of these pieces complement the other to form a coherent locomotor  
8 behavior will certainly benefit from future characterizations of leech-specific DA  
9 receptor sub-types.

### 10 11 **ACKNOWLEDGEMENTS**

12 We thank Drs. William B. Kristan, Jr. and James Angstadt for helpful discussions and  
13 insights throughout our study and thank Dr. Josh Puhl, Ms. Windy Lynch, Mr. Bilal  
14 Alkatout and Ms. Nicole Marvin for technical assistance. We are also most grateful to  
15 the expert anonymous reviewers whose helpful suggestions greatly strengthened the final  
16 version of our manuscript.

### 17 18 **FUNDING**

19 This research was supported by NSF grants (IOS-0924119) awarded to K.M.C. and (IOS-  
20 0924155) to K.A.M.

### 21 22 **FIGURE LEGENDS**

23 **Figure 1.** The phosphodiesterase inhibitor (PDI) theophylline (THP) caused bursting  
24 activity in motoneuron DE-3 (largest unit) recorded from the dorsal posterior (DP) nerve.  
25 (A) Activity in the DP nerve of a single, isolated ganglion was quiescent in normal saline  
26 (NS) after 20 min (top trace), but became rhythmically active after a 10-20 min exposure  
27 to 4.4 mM THP (middle trace) (13 of 15 preparations). Bursting was not induced by  
28 exposing ganglia for up to 30 min in the adenosine receptor blocker 8(p-sulphophenyl)  
29 theophylline (SPL; 4.4 mM) (bottom trace, different preparation, n = 3). (B) Statistical  
30 analyses of burst periods and durations induced by 75  $\mu$ M DA, 4.4 mM THP, 0.5 mM  
31 IBMX and 25  $\mu$ M clotrimazole (CLO; an IK channel blocker) was compared across all

1 treatment groups ( $n = 10$  for each group, except  $n = 3$  for CLO). Drugs were applied to  
2 single, isolated ganglia. Bursting in these groups was also compared with crawl bursts  
3 collected during spontaneous fictive crawling exhibited in isolated whole nerve cords  
4 (labeled CNS in NS without DA) ( $n = 10$ ). DA and CNS raw data were obtained from  
5 DA studies originally reported in Puhl and Mesce (2008) and reanalyzed here for  
6 comparison. Asterisk represents the only statistically significant difference between  
7 treatment conditions: burst durations in CLO were longer than in other conditions ( $p <$   
8  $0.01$ ). Error bars represent the standard error of the mean. (C) THP-induced bursting in  
9 DP nerves ( $4.4$  mM) across chains of ganglia ( $n = 4$ ). Note that normal intersegmental  
10 delays, however, are lacking due to absence of the cephalic ganglion, shown previously  
11 to be necessary for intersegmental coordination of the crawl oscillators (Puhl and Mesce,  
12 2010).

13

14 **Figure 2.** IBMX-induced crawl-like bursting in DE-3 is reversibly inhibited by  $200$   $\mu$ M  
15 riluzole ( $n = 4$ ), a sodium channel blocker that impairs the persistent sodium current  
16 while sparing the transient component (Angstadt et al., 2011; Kononenko et al., 2004;  
17 Niespodziany et al., 2004; Urbani and Belluzzi, 2000). (A)  $0.5$  mM IBMX induced  
18 crawl-like DE-3 bursting in the DP nerve of a single, isolated ganglion. (B) Perfusion of  
19  $0.5$  mM IBMX +  $200$   $\mu$ M riluzole, at a rate of  $1$ - $2$  ml/min, inhibited this bursting in the  
20 same ganglion as in (A). (C) Washout with  $0.5$  mM IBMX (without riluzole) restored  
21 bursting.

22

23 **Figure 3.** IBMX-induced crawl-like bursting and crawl-network activation across  
24 identified crawl motoneurons. Intracellular recordings from various motoneurons were  
25 made while recording DE-3 extracellular activity in the DP nerve. (A, C) Similar to DA-  
26 induced fictive crawling, the inhibitory motoneurons DI-1 (A) and VI-2 (C) were  
27 hyperpolarized during DE-3 bursting. (B) The excitatory VE-4 motoneuron was  
28 depolarized during DE-3 activity, as it normally is during DA application. (D) Unlike  
29 fictive crawling, IBMX caused CV bursting that appeared in phase with DE-3 (recorded  
30 via DP nerve). Note: Intracellular spike amplitudes are typically small and often overlay

1 larger synaptic potentials because spike-generating zones are distal to the recording sites  
2 (i.e., somata), which are relatively inexcitable in the leech.

3  
4 **Figure 4.** Dopaminergic modulation of the dynamic membrane properties of crawl-  
5 related motoneurons CV and AE. (A) DA (75  $\mu$ M) increased the peak amplitude, but  
6 attenuated the duration of the post-inhibitory rebound (PIR) in CV; the  
7 afterhyperpolarization (AHP) was enhanced. (B) DA shortened the PIR duration in AE  
8 and enhanced the duration of the AHP. Dotted lines in (A) and (B) indicate the resting  
9 membrane potential as determined prior to stimulation. (C) Summary of area-under-the-  
10 curve measurements of PIR and AHP in CV in normal saline (NS) (n = 14) and in DA (n  
11 = 11). (D) Summary of area-under-the-curve measurements of PIR and AHP in AE in  
12 NS (n = 7) and in DA (n = 10). Asterisks indicate statistically significant differences ( $p <$   
13 0.05).

14  
15 **Figure 5.** Dopaminergic modulation of excitability of the crawl motoneurons CV and  
16 AE. (A) A 1-sec pulse of +1 nA depolarizing elicits a 24 Hz response from AE in NS,  
17 but only an 18 Hz response in DA. (B) Injection of a 1-sec pulse of +1 nA depolarizing  
18 current elicits a 30 Hz response from CV in NS, but only 25 Hz in 75  $\mu$ M DA. (C) F-I  
19 curves of AE in NS (n = 4), DA (n = 5) and THP (n = 6). (D) F-I curves depicting steady  
20 state firing as a function of input current of CV in NS (n = 9), DA (n = 8) and the PDI  
21 theophylline (THP; n = 4). In both graphs (C) and (D), the resting discharge rate (0 nA  
22 injected current) in THP was statistically different relative to NS or DA ( $p <$  0.05), and  
23 the slope of the F-I curve in DA was statistically different relative to NS or THP ( $p <$   
24 0.05); see Results for details of the statistical analysis.

25  
26

## REFERENCES

- 1
- 2       **Ali, D. W., Catarsi, S. and Drapeau, P.** (1998). Iontropic and metabotropic  
3 activation of a neuronal chloride channel by serotonin and dopamine in the leech *Hirudo*  
4 *medicinalis*. *J Physiol* **509**, 211-9.
- 5       **Angstadt, J. D. and Choo, J. J.** (1996) Sodium-dependent plateau potentials in  
6 cultured Retzius cells of the medicinal leech. *J Neurophysiol* **76**, 1491-1502.
- 7       **Angstadt, J. D., Choo, J. J. and Saran, A. M.** (1998). Effects of transition metal  
8 ions on spontaneous electrical activity and chemical synaptic transmission of neurons in  
9 the medicinal leech. *J Comp Physiol A* **182**, 389-401.
- 10       **Angstadt, J. D. and Friesen, W. O.** (1991). Synchronized oscillatory activity in  
11 leech neurons induced by calcium channel blockers. *J Neurophysiol* **66**, 1858-73.
- 12       **Angstadt, J. D., Grassmann, J. L., Theriault, K. M. and Levasseur, S. M.**  
13 (2005). Mechanisms of postinhibitory rebound and its modulation by serotonin in  
14 excitatory swim motor neurons of the medicinal leech. *J Comp Physiol A* **191**, 715-32.
- 15       **Angstadt, J. D., Simone, A. M. and Peters, N. V.** (2011). Effects of riluzole on  
16 cell DE-3 of the medicinal leech: Evidence that a persistent sodium current contributes to  
17 postinhibitory rebound responses and bursting activity induced by calcium-channel  
18 blockers. *2011 Neuroscience Meeting Planner Program No. 918.01*, Washington, DC:  
19 Society for Neuroscience. Online.
- 20       **Ayali, A. and Harris-Warrick, R. M.** (1999). Monoamine control of the  
21 pacemaker kernel and cycle frequency in the lobster pyloric network. *J Neurosci* **19**,  
22 6712-22.
- 23       **Bartolommei, G., Devaux, N., Tadini-Buoninsegni, F., Moncelli, M. and**  
24 **Apell, H. J.** (2008). Effect of clotrimazole on the pump cycle of the Na,K-ATPase.  
25 *Biophys J* **95**, 1813-25.
- 26       **Biondi, C., Campi, A. L., Pareschi, M. C., Portolan, A. and Ferretti, M. E.**  
27 (1990). RMI 12330A, an inhibitor of adenylate cyclase and cyclic AMP-  
28 phosphodiesterase activities in the segmental ganglia of the leech *Hirudo medicinalis*.  
29 *Neurosci Lett* **113**, 322-7.
- 30       **Boehmer, G., Greffrath, W., Martin, E. and Hermann, S.** (2000).  
31 Subthreshold oscillation of the membrane potential in magnocellular neurones of the rat  
32 supraoptic nucleus. *J Physiol* **526**, 115-28.
- 33       **Briggman, K. L., Abarbanel, H. D. and Kristan, W. B., Jr.** (2005). Optical  
34 imaging of neuronal populations during decision-making. *Science* **307**, 896-901.
- 35       **Burrell, B. D. and Crisp, K. M.** (2008). Serotonergic modulation of  
36 afterhyperpolarization in a neuron that contributes to learning in the leech. *J*  
37 *Neurophysiol* **99**, 605-16.
- 38       **Burrell, B. D. and Sahley, C. L.** (2001). Learning in simple systems. *Curr Opin*  
39 *Neurobiol* **11**, 757-64.
- 40       **Chandler, S. H. and Goldberg, L. J.** (1984). Differentiation of the neural  
41 pathways mediating cortically induced and dopaminergic activation of the central pattern  
42 generator (CPG) for rhythmical jaw movements in the anesthetized guinea pig. *Brain Res*  
43 **323**, 297-301.
- 44       **Clemens, S., Calin-Jageman, R., Sakurai, A. and Katz, P. S.** (2007). Altering  
45 cAMP levels within a central pattern generator modifies or disrupts rhythmic motor  
46 output. *J Comp Physiol A* **193**, 1265-71.

- 1           **Clemens, S. and Katz, P. S.** (2003). G protein signaling in a neuronal network is  
2 necessary for rhythmic motor pattern production. *J Neurophysiol* **89**, 762-72.
- 3           **Colombaioni, L. and Brunelli, M.** (1988). Neurotransmitter-induced modulation  
4 of an electrotonic synapse in the CNS of *Hirudo medicinalis*. *Exp Biol* **47**, 139-44.
- 5           **Crisp, K. M. and Mesce, K. A.** (2004). A cephalic projection neuron involved in  
6 locomotion is dye coupled to the dopaminergic neural network in the medicinal leech. *J*  
7 *Exp Biol* **207**, 4535-42.
- 8           **Crisp, K. M. and Muller, K. J.** (2006). A 3-synapse positive feedback loop  
9 regulates the excitability of an interneuron critical for sensitization in the leech. *J*  
10 *Neurosci* **26**, 3524-31.
- 11           **Dai, Y., Jones, K. E., Fedirchuk, B., Krawitz, S. and Jordan, L. M.** (1998).  
12 Modeling the lowering of motoneuron voltage threshold during fictive locomotion. *Ann N*  
13 *Y Acad Sci* **860**, 492-5.
- 14           **Eisenhart, F. J., Cacciatore, T. W. and Kristan, W. B., Jr.** (2000). A central  
15 pattern generator underlies crawling in the medicinal leech. *J Comp Physiol A* **186**, 631-  
16 43.
- 17           **Engbers, J. D., Anderson, D., Asmara, H., Rehak, R., Mehaffey, W. H.,**  
18 **Hameed, S., McKay, B. E., Kruskic, M., Zamponi, G. W. and Turner, R. W.** (2012).  
19 Intermediate conductance calcium-activated potassium channels modulate summation of  
20 parallel fiber input in cerebellar Purkinje cells. *Proc Natl Acad Sci U S A* **109**, 2601-6.
- 21           **Esch, T., Mesce, K. A. and Kristan, W. B.** (2002). Evidence for sequential  
22 decision making in the medicinal leech. *J Neurosci* **22**, 11045-54.
- 23           **Fedirchuk, B. and Dai, Y.** (2004). Monoamines increase the excitability of  
24 spinal neurones in the neonatal rat by hyperpolarizing the threshold for action potential  
25 production. *J Physiol* **557**, 355-61.
- 26           **Flamm, R. E. and Harris-Warrick, R. M.** (1986). Aminergic modulation in  
27 lobster stomatogastric ganglion. I. Effects on motor pattern and activity of neurons within  
28 the pyloric circuit. *J Neurophysiol* **55**, 847-65.
- 29           **Frankenhaeuser, B. and Hodgkin, A. L.** (1957). The action of calcium on the  
30 electrical properties of squid axons. *J Physiol* **137**, 218-44.
- 31           **Garcia-Perez, E., Mazzoni, A. and Torre, V.** (2007). Spontaneous electrical  
32 activity and behavior in the leech *Hirudo medicinalis*. *Front Integr Neurosci* **1**, 8.
- 33           **Gutfreund, Y., Yarom, Y. and Segev, I.** (1995). Subthreshold oscillations and  
34 resonant frequency in guinea-pig cortical neurons: physiology and modelling. *J Physiol*  
35 **483**, 621-40.
- 36           **Harris-Warrick, R. M., Coniglio, L. M., Levini, R. M., Gueron, S. and**  
37 **Guckenheimer, J.** (1995). Dopamine modulation of two subthreshold currents produces  
38 phase shifts in activity of an identified motoneuron. *J Neurophysiol* **74**, 1404-20.
- 39           **Hashemzadeh-Gargari, H. and Friesen, W. O.** (1989). Modulation of  
40 swimming activity in the medicinal leech by serotonin and octopamine. *Comp Biochem*  
41 *Physiol C* **94**, 295-302.
- 42           **Hocker, C. G., Yu, X. and Friesen, W. O.** (2000). Functionally heterogeneous  
43 segmental oscillators generate swimming in the medical leech. *J Comp Physiol A* **186**,  
44 871-83.



- 1       **Hu, H., Vervaeke, K. and Storm, J. F.** (2002). Two forms of electrical  
2 resonance at theta frequencies, generated by M-current, h-current and persistent Na<sup>+</sup>  
3 current in rat hippocampal pyramidal cells. *J Physiol* **545**, 783-805.
- 4       **Hunt, N. H. and Evans, T.** (1980). RMI 12330A, an inhibitor of cyclic  
5 nucleotide phosphodiesterases and adenylate cyclase in kidney preparations. *Biochim*  
6 *Biophys Acta* **613**, 499-506.
- 7       **Ishii, T. M., Silvia, C., Hirschberg, B., Bond, C. T., Adelman, J. P. and**  
8 **Maylie, J.** (1997). A human intermediate conductance calcium-activated potassium  
9 channel. *Proc Natl Acad Sci U S A* **94**, 11651-6.
- 10       **Joiner, W. J., Wang, L. Y., Tang, M. D. and Kaczmarek, L. K.** (1997). hSK4,  
11 a member of a novel subfamily of calcium-activated potassium channels. *Proc Natl Acad*  
12 *Sci U S A* **94**, 11013-8.
- 13       **Katz, P. S.** (1998). Neuromodulation intrinsic to the central pattern generator for  
14 escape swimming in *Tritonia*. *Ann N Y Acad Sci* **860**, 181-8.
- 15       **Katz, P. S. and Frost, W. N.** (1997). Removal of spike frequency adaptation via  
16 neuromodulation intrinsic to the *Tritonia* escape swim central pattern generator. *J*  
17 *Neurosci* **17**, 7703-13.
- 18       **Kemnitz, C. P.** (1997). Dopaminergic modulation of spinal neurons and synaptic  
19 potentials in the lamprey spinal cord. *J Neurophysiol* **77**, 289-98.
- 20       **Kloppenborg, P., Levini, R. M. and Harris-Warrick, R. M.** (1999). Dopamine  
21 modulates two potassium currents and inhibits the intrinsic firing properties of an  
22 identified motor neuron in a central pattern generator network. *J Neurophysiol* **81**, 29-38.
- 23       **Kononenko, N. I., Shao, L. R. and Dudek, F. E.** (2004). Riluzole-sensitive  
24 slowly inactivating sodium current in rat suprachiasmatic nucleus neurons. *J*  
25 *Neurophysiol* **91**, 710-8.
- 26       **Kristan, W. B., Jr., Calabrese, R. L. and Friesen, W. O.** (2005). Neuronal  
27 control of leech behavior. *Prog Neurobiol* **76**, 279-327.
- 28       **Lafreniere-Roula, M. and McCreia, D. A.** (2005). Deletions of rhythmic  
29 motoneuron activity during fictive locomotion and scratch provide clues to the  
30 organization of the mammalian central pattern generator. *J Neurophysiol* **94**, 1120-32.
- 31       **Lapointe, N. P., Rouleau, P., Ung, R. V. and Guertin, P. A.** (2009). Specific  
32 role of dopamine D1 receptors in spinal network activation and rhythmic movement  
33 induction in vertebrates. *J Physiol* **587**, 1499-511.
- 34       **Mesce, K. A. and Pierce-Shimomura, J. T.** (2010). Shared strategies for  
35 behavioral switching: understanding how locomotor patterns are turned on and off. *Front*  
36 *Behav Neurosci* **4**, article 49, 1-5.
- 37       **Milde, H., Weber, W. M., Salzert, M. and Clauss, W.** (2001). Regulation of Na<sup>+</sup>  
38 transport across leech skin by peptide hormones and neurotransmitters. *J Exp Biol* **204**,  
39 1509-17.
- 40       **Mink, J. W.** (1996). The basal ganglia: focused selection and inhibition of  
41 competing motor programs. *Prog Neurobiol* **50**, 381-425.
- 42       **Mullins, O. J., Hackett, J. T., Buchanan, J. T. and Friesen, W. O.** (2011).  
43 Neuronal control of swimming behavior: comparison of vertebrate and invertebrate  
44 model systems. *Prog Neurobiol* **93**, 244-69.
- 45       **Mustard, J. A., Beggs, K. T. and Mercer, A. R.** (2005). Molecular biology of  
46 the invertebrate dopamine receptors. *Arch Insect Biochem Physiol* **59**, 103-17.

- 1        **Neylon, C. B., D'Souza, T. and Reinhart, P. H.** (2004). Protein kinase A  
2 inhibits intermediate conductance  $Ca^{2+}$ -activated  $K^+$  channels expressed in *Xenopus*  
3 *oocytes*. *Pflugers Arch* **448**, 613-20.
- 4        **Nicholls, J. G. and Baylor, D. A.** (1968). Specific modalities and receptive fields  
5 of sensory neurons in CNS of the leech. *J Neurophysiol* **31**, 740-56.
- 6        **Niespodziany, I., Klitgaard, H. and Margineanu, D. G.** (2004). Is the persistent  
7 sodium current a specific target of anti-absence drugs? *Neuroreport* **15**, 1049-52.
- 8        **Nikitin, E. S., Kiss, T., Staras, K., O'Shea, M., Benjamin, P. R. and Kemenes,**  
9 **G.** (2006). Persistent sodium current is a target for cAMP-induced neuronal plasticity in a  
10 state-setting modulatory interneuron. *J Neurophysiol* **95**, 453-63.
- 11        **Ort, C. A., Kristan, W. B. and Stent, G. S.** (1974). Neuronal control of  
12 swimming in the medicinal leech. II. Identification and connections of motor neurons. *J*  
13 *Comp Physiol* **94**, 121-154.
- 14        **Puhl, J. G. and Mesce, K. A.** (2008). Dopamine activates the motor pattern for  
15 crawling in the medicinal leech. *J Neurosci* **28**, 4192-200.
- 16        **Puhl, J. G. and Mesce, K. A.** (2010). Keeping it together: mechanisms of  
17 intersegmental coordination for a flexible locomotor behavior. *J Neurosci* **30**, 2373-83.
- 18        **Quinlan, E. M., Arnett, B. C. and Murphy, A. D.** (1997). Feeding stimulants  
19 activate an identified dopaminergic interneuron that induces the feeding motor program  
20 in *Helisoma*. *J Neurophysiol* **78**, 812-24.
- 21        **Rybak, I. A., Shevtsova, N. A., Lafreniere-Roula, M. and McCrea, D. A.**  
22 (2006). Modelling spinal circuitry involved in locomotor pattern generation: insights  
23 from deletions during fictive locomotion. *J Physiol* **577**, 617-39.
- 24        **Salzet, B., Stefano, G. B., Verger-Bocquet, M. and Salzet, M.** (1998). Putative  
25 leech dopamine D1-like receptor molecular characterization: sequence homologies  
26 between dopamine and serotonin leech CNS receptors explain pharmacological cross-  
27 reactivities. *Brain Res Mol Brain Res* **58**, 47-58.
- 28        **Sargent, P. B.** (1975). Transmitters in the leech central nervous system: analysis  
29 of sensory and motor cells. PhD thesis, Harvard University, Cambridge.
- 30        **Sawin, E. R., Ranganathan, R. and Horvitz, H. R.** (2000). *Caenorhabditis*  
31 *elegans* locomotory rate is modulated by the environment through a dopaminergic  
32 pathway and by experience through a serotonergic pathway. *Neuron* **26**, 619-31.
- 33        **Smith, Y., Bevan, M. D., Shink, E. and Bolam, J. P.** (1998). Microcircuitry of  
34 the direct and indirect pathways of the basal ganglia. *Neuroscience* **86**, 353-87.
- 35        **Stoof, J. C., De Vlieger, T. A. and Lodder, J. C.** (1984). Opposing roles for D1  
36 and D2 dopamine receptors in regulating the excitability of growth hormone-producing  
37 cells in the snail *Lymnaea stagnalis*. *Eur J Pharmacol* **106**, 431-5.
- 38        **Teyke, T., Rosen, S. C., Weiss, K. R. and Kupfermann, I.** (1993).  
39 Dopaminergic neuron B20 generates rhythmic neuronal activity in the feeding motor  
40 circuitry of *Aplysia*. *Brain Res* **630**, 226-37.
- 41        **Urbani, A. and Belluzzi, O.** (2000). Riluzole inhibits the persistent sodium  
42 current in mammalian CNS neurons. *Eur J Neurosci* **12**, 3567-74.
- 43        **Vallecorsa, G. M., Amatrudo, J. M. and Angstadt, J. D.** (2007). Dopamine  
44 induces rhythmic activity and enhances postinhibitory rebound in a leech motor neuron  
45 involved in swimming and crawling behaviors. *Impulse* **4**, online.

1           **Vidal-Gadea, A., Topper, S., Young, L., Crisp, A., Kressin, L., Elbel, E.,**  
2 **Maples, T., Brauner, M., Erbguth, K., Axelrod, A. et al.** (2011). *Caenorhabditis*  
3 *elegans* selects distinct crawling and swimming gaits via dopamine and serotonin. *Proc*  
4 *Natl Acad Sci U S A* **108**, 17504-9.

5           **Wu, N., Enomoto, A., Tanaka, S., Hsiao, C. F., Nykamp, D. Q., Izhikevich, E.**  
6 **and Chandler, S. H.** (2005). Persistent sodium currents in mesencephalic v neurons  
7 participate in burst generation and control of membrane excitability. *J Neurophysiol* **93**,  
8 2710-22.

9           **Zhang, H., Rodgers, E. W., Krenz, W. D., Clark, M. C. and Baro, D. J.**  
10 (2010). Cell specific dopamine modulation of the transient potassium current in the  
11 pyloric network by the canonical D1 receptor signal transduction cascade. *J Neurophysiol*  
12 **104**, 873-84.

13           **Zhao, S., Golowasch, J. and Nadim, F.** (2010). Pacemaker neuron and network  
14 oscillations depend on a neuromodulator-regulated linear current. *Front Behav Neurosci*  
15 **4**, article 21, 1-9.

16  
17

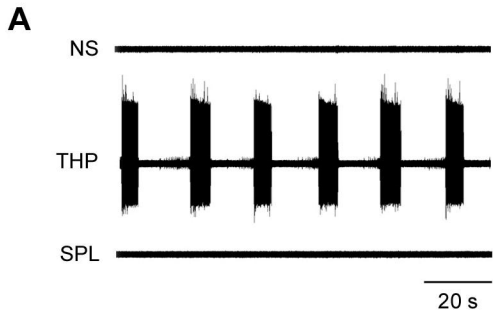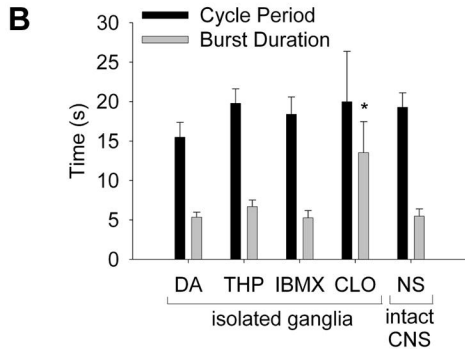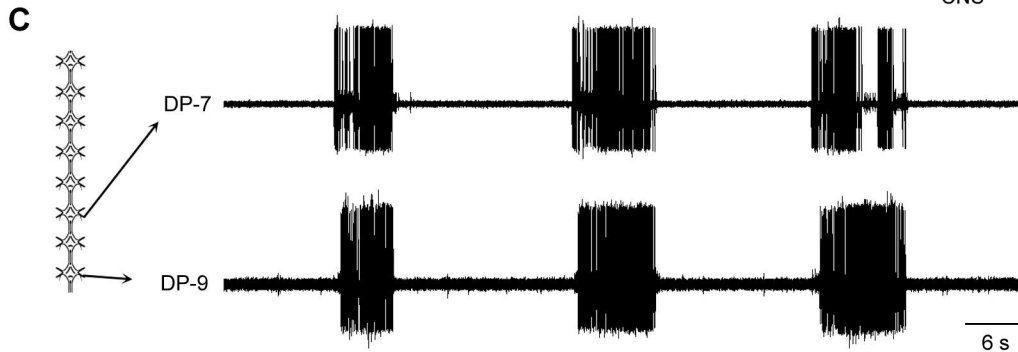

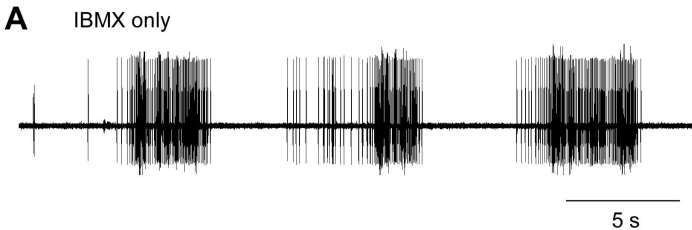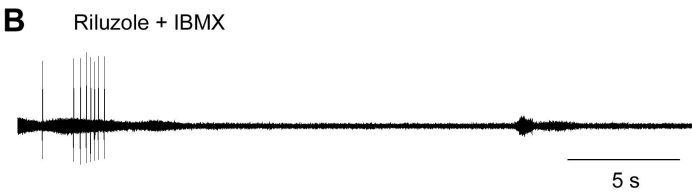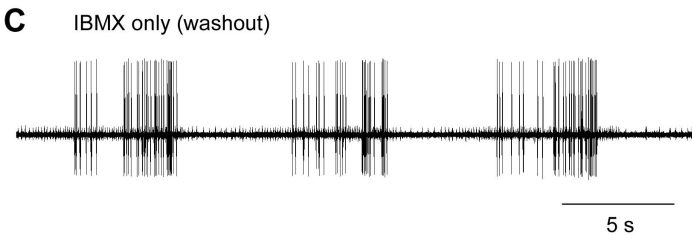

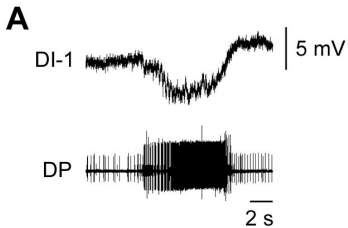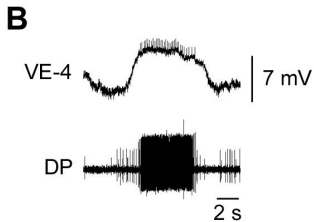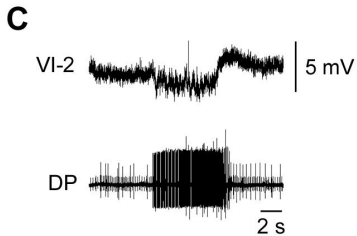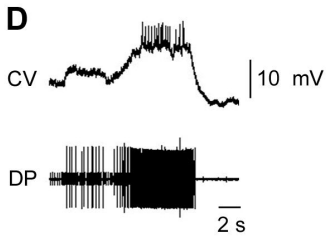

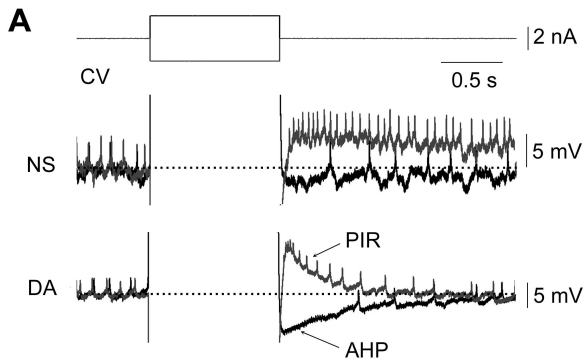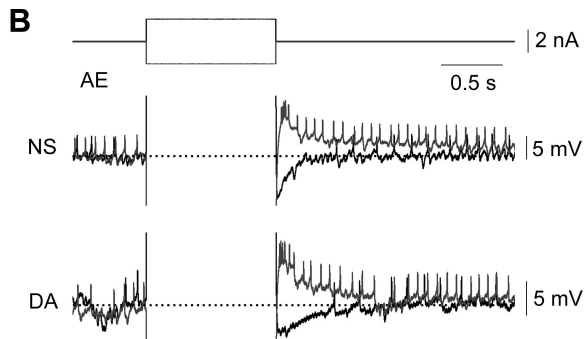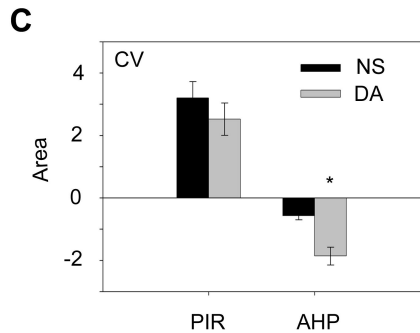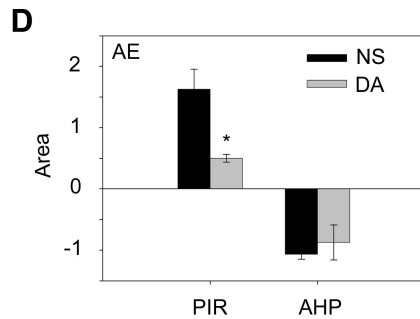

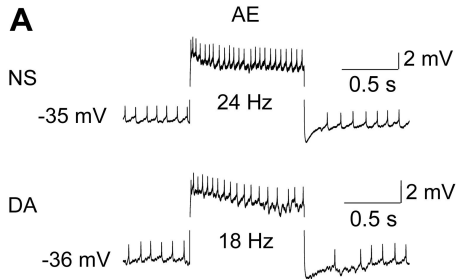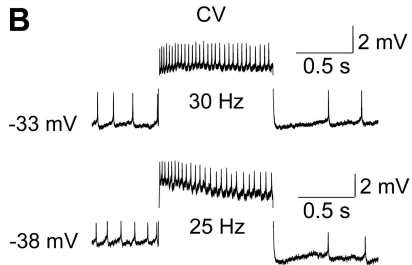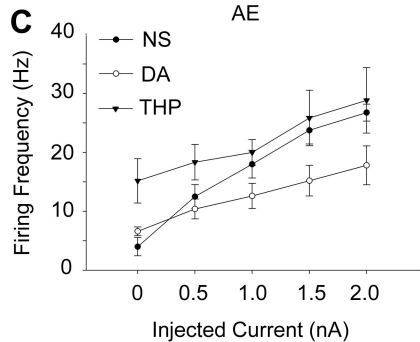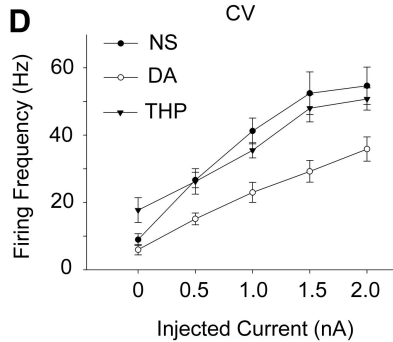

Source: https://cob.silverchair.com/jeb/article-pdf/doi/10.1242/jeb.069245/2005426/jeb_069245.pdf
